# Supplementary material for: Benefits and limits of biological nitrification inhibitors for plant nitrogen uptake and the environment
Source: PubMed Central journal article supplement (PMC11217430; doi:10.1038/s41598-024-65247-2), 2024-07-01
Supplement: 41598_2024_65247_MOESM1_ESM.pdf [file 41598_2024_65247_MOESM1_ESM.pdf]

# Supplemental Figures to “Benefits and limits of biological nitrification inhibitors for plant nitrogen uptake and the environment”

Christian W. Kuppe and Johannes A. Postma

Scientific Reports, 2024

## List of Figures

|    |                                                                            |   |
|----|----------------------------------------------------------------------------|---|
| S1 | Influence of initial N in soil . . . . .                                   | 2 |
| S2 | Cumulative uptake of nitrate and ammonium by root and root hairs . . . . . | 3 |

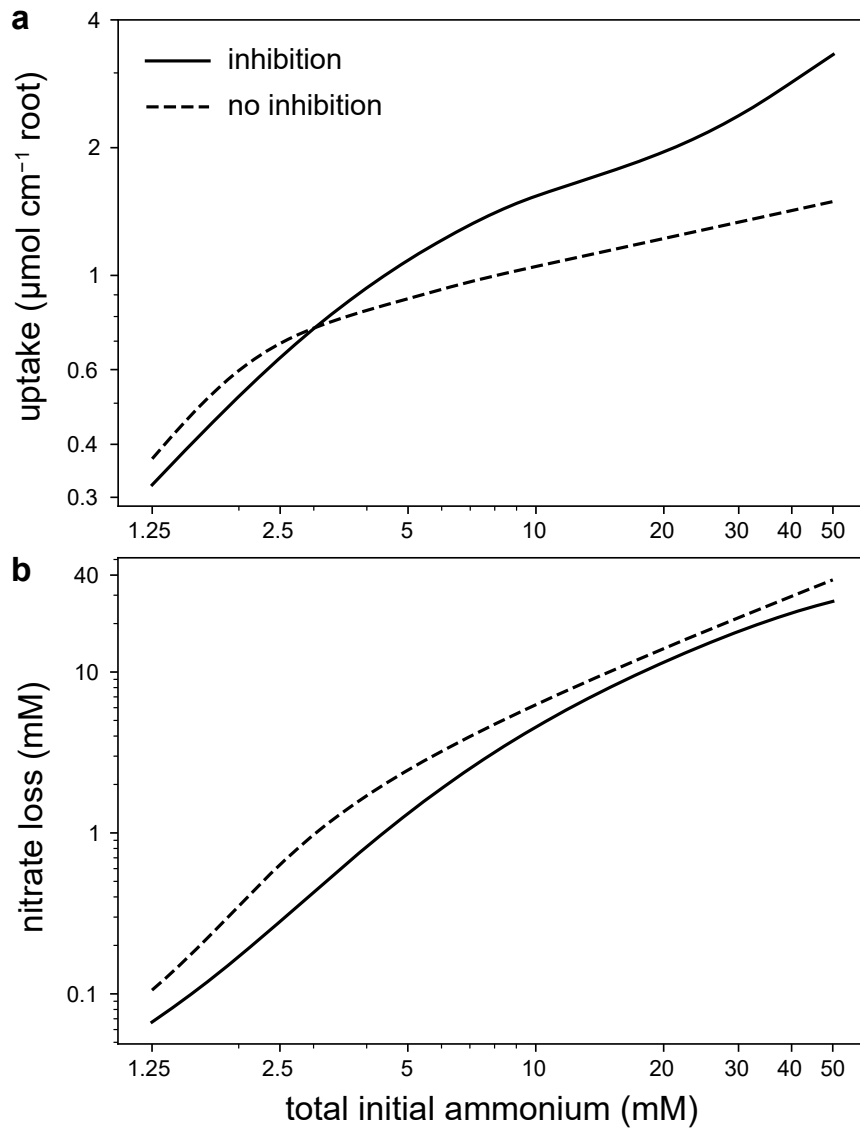

Figure S1: Influence of initial N in soil on (a) total N uptake per root segment of unit length and (b) nitrate concentration loss from the rhizosphere. The ammonium in soil is buffered, i. e., [0.025; 1] mM ammonium in the plant available soil solution. Parameter values are in Table 1. Note, the axes are log-transformed.

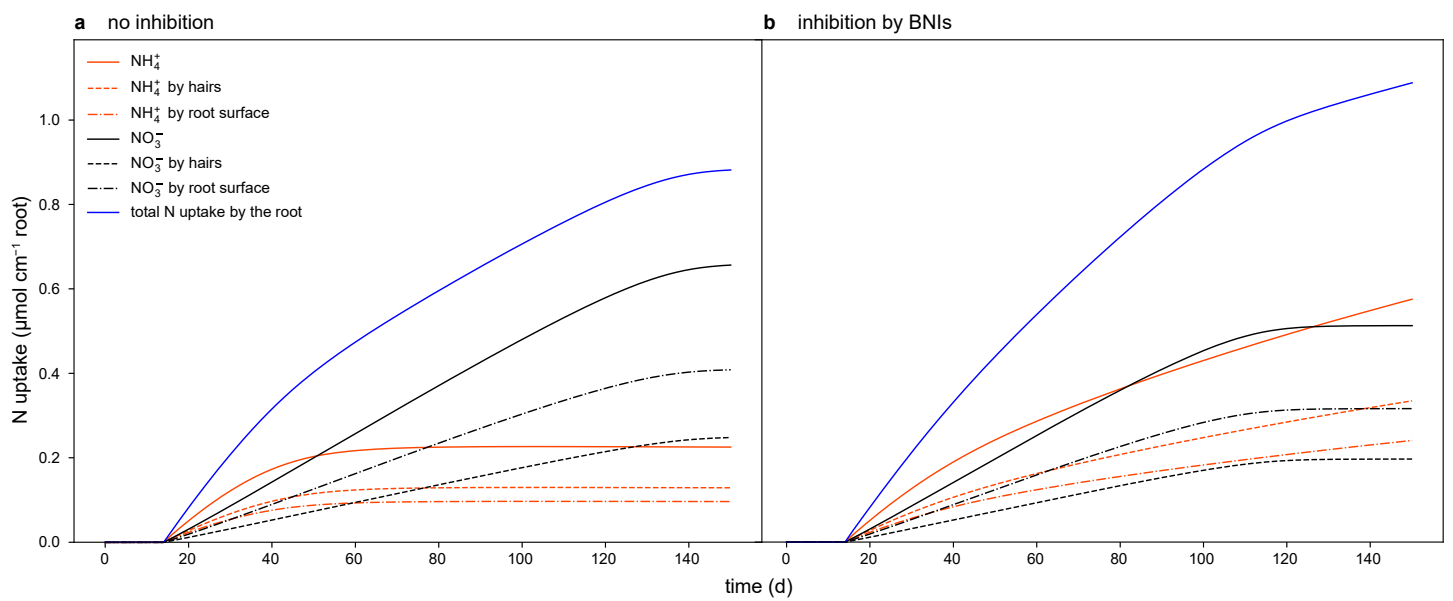

Figure S2: Cumulative uptake of nitrate and ammonium by a root of unit length and its hairs, without (a) and with BNIs (b). Parameter values are in Table 1.
